# Supplementary material for: Spatial Distribution and Physicochemical Properties of Respirable Volcanic Ash From the 16–17 August 2006 Tungurahua Eruption (Ecuador), and Alveolar Epithelium Response In‐Vitro
Source: PubMed Central journal article supplement (PMC9758688; doi:10.1029/2022gh000680), 2022-12-01
Supplement: GH2-6-e2022GH000680-s001.pdf [file GH2-6-e2022GH000680-s001.pdf]

**Spatial distribution and physicochemical properties of respirable volcanic ash from the 16-17 August 2006 Tungurahua eruption (Ecuador), and alveolar epithelium response *in-vitro***

**Supplemental Material**

Julia Eychenne<sup>1,2\*</sup>, Lucia Gurioli<sup>1</sup>, David Damby<sup>3</sup>, Corinne Belville<sup>2</sup>, Federica Schiavi<sup>1</sup>, Geoffroy Marceau<sup>2,4</sup>, Claire Szczepaniak<sup>5</sup>, Christelle Blavignac<sup>5</sup>, Mickael Laumonier<sup>1</sup>, Emmanuel Gardés<sup>1</sup>, Jean-Luc Le Pennec<sup>6,7</sup>, Jean-Marie Nedelec<sup>8</sup>, Loïc Blanchon<sup>2</sup>, Vincent Sapin<sup>2,4</sup>

<sup>1</sup> Université Clermont Auvergne, CNRS, IRD, OPGC, Laboratoire Magmas et Volcans, F-63000 Clermont-Ferrand, France

<sup>2</sup> Université Clermont Auvergne, CNRS, INSERM, Institut de Génétique Reproduction et Développement, F-63000 Clermont-Ferrand, France

<sup>3</sup> U.S. Geological Survey, California Volcano Observatory, Moffett Field, CA, USA

<sup>4</sup> Biochemistry and Molecular Genetic Department, University Hospital, F-63000 Clermont-Ferrand, France

<sup>5</sup> Université Clermont Auvergne, UCA PARTNER, Centre Imagerie Cellulaire Santé, F-63000 Clermont-Ferrand, France

<sup>6</sup> Geo-Ocean, CNRS, Ifremer, UMR6538, F-29280 Plouzané, France

<sup>7</sup> IRD Office for Indonesia & Timor Leste, Jalan Kemang Raya n°4, Jakarta 12730, Indonesia

<sup>8</sup> Université Clermont Auvergne, Clermont Auvergne INP, CNRS, ICCFn, F-63000 Clermont-Ferrand, France

**Content of this file:**

**Supplemental Figures S1 to S2 with captions**

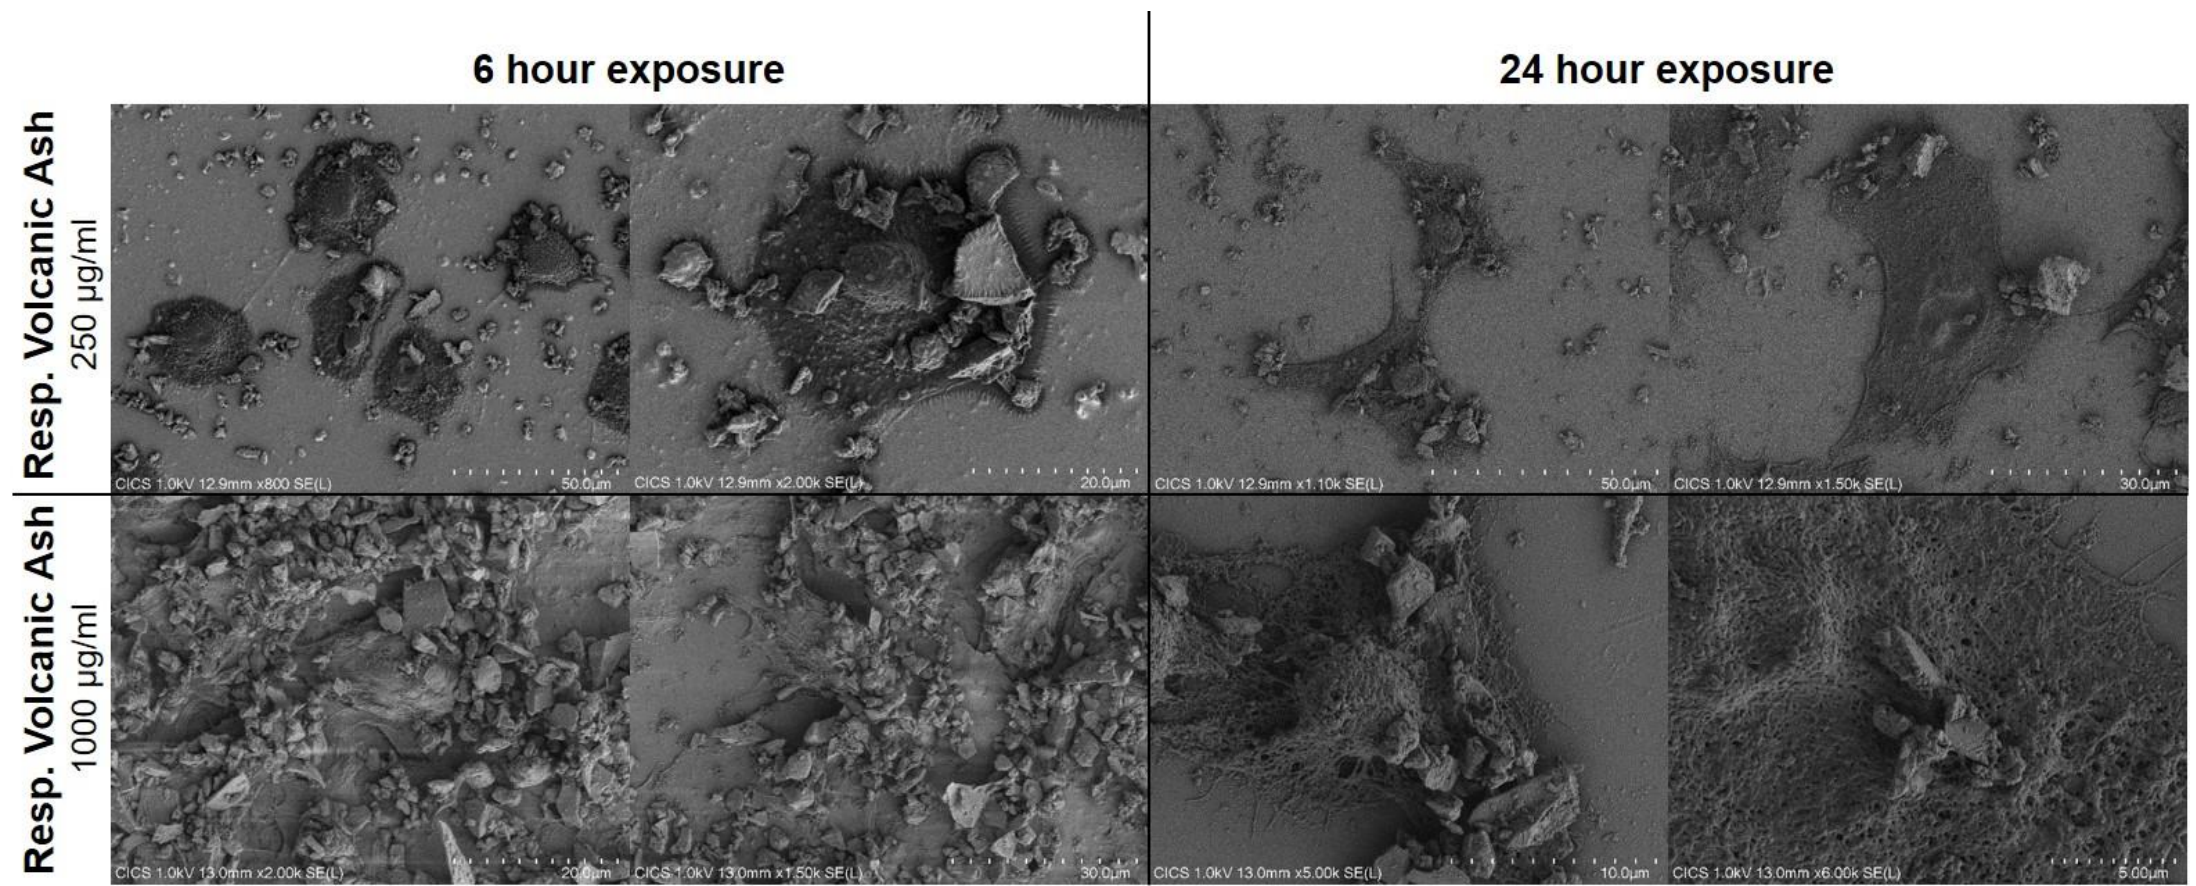

**Fig. S1:** Interactions between A549 cells and respirable Tungurahua volcanic ash at doses of 250 µg/ml and 1000 µg/ml after 6 and 24h of exposure, imaged by FEG-SEM.

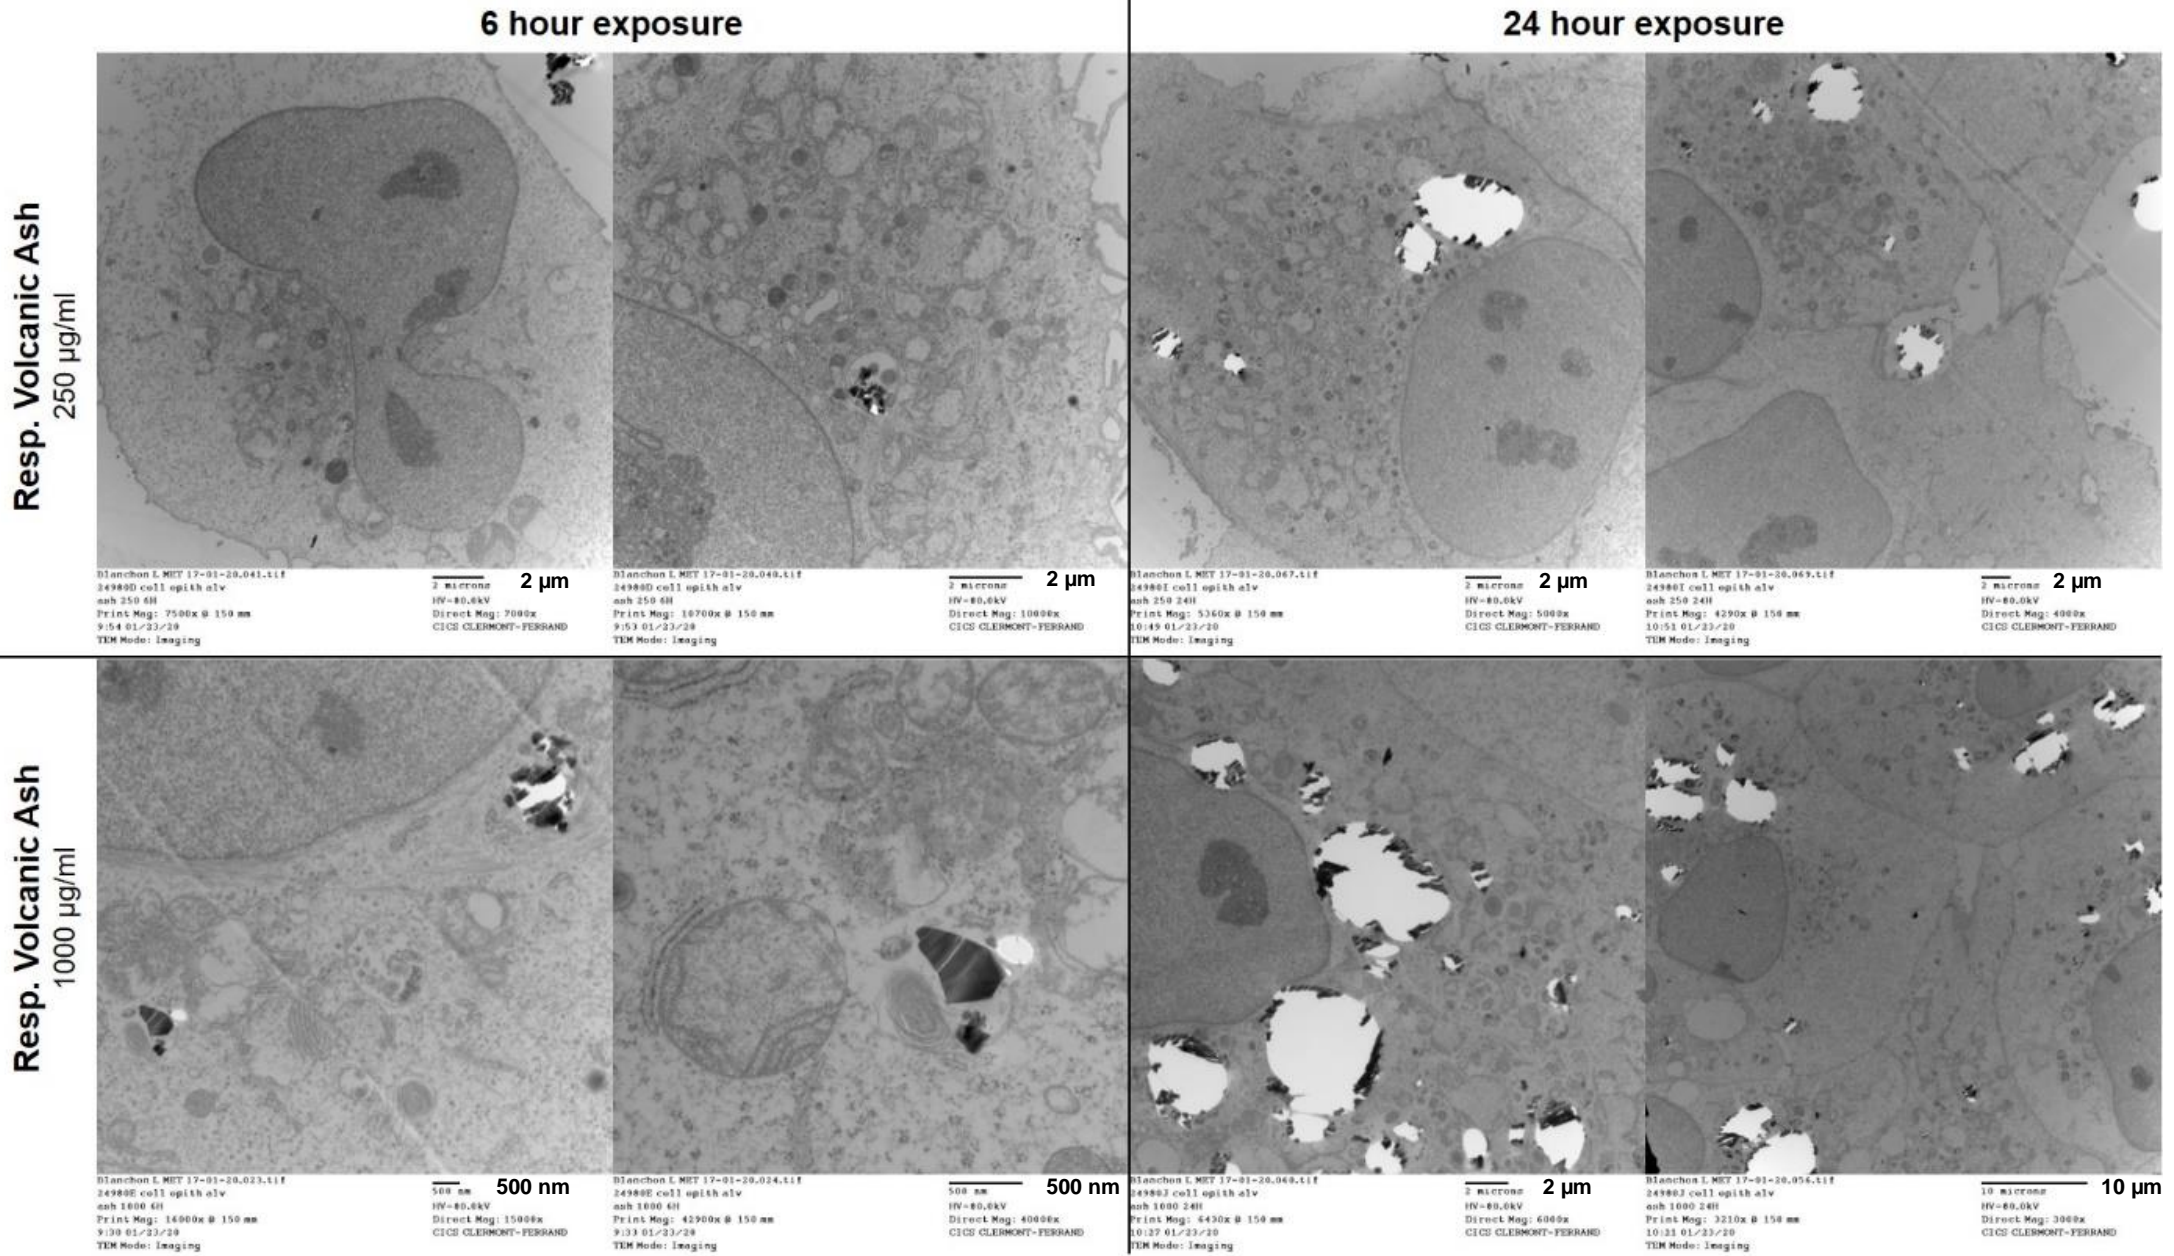

**Fig. S2:** Interactions between A549 cells and respirable Tungurahua volcanic ash at doses of 250 µg/ml and 1000 µg/ml after 6 and 24h of exposure, imaged by TEM.
